# Supplementary material for: Multifunctional rare earth molecular ferroelectrics with a piezoelectric response: ((nBu)4N)3[Ce(NO3)4(SCN)2]((CH3CH2CH2CH2)4N = tetrabutylammonium)
Source: Royal Society of Chemistry journal article supplement (doi:10.1039/d1ce01153g), 2021-01-01
Supplement: d1ce01153g1.pdf [file d1ce01153g1.pdf]

## Electronic Supplementary Materials (ESI)

### Rare earth molecular ferroelectrics with piezoelectric response

Tingting Ying, Yuhui Tan\*, Yunzhi Tang\*, Xiao Long, Ning Song, Yukong

Li and Zhen Sun

\* Faculty of materials Metallurgy and Chemistry, Jiangxi University of Science and Technology, Ganzhou 341000, China

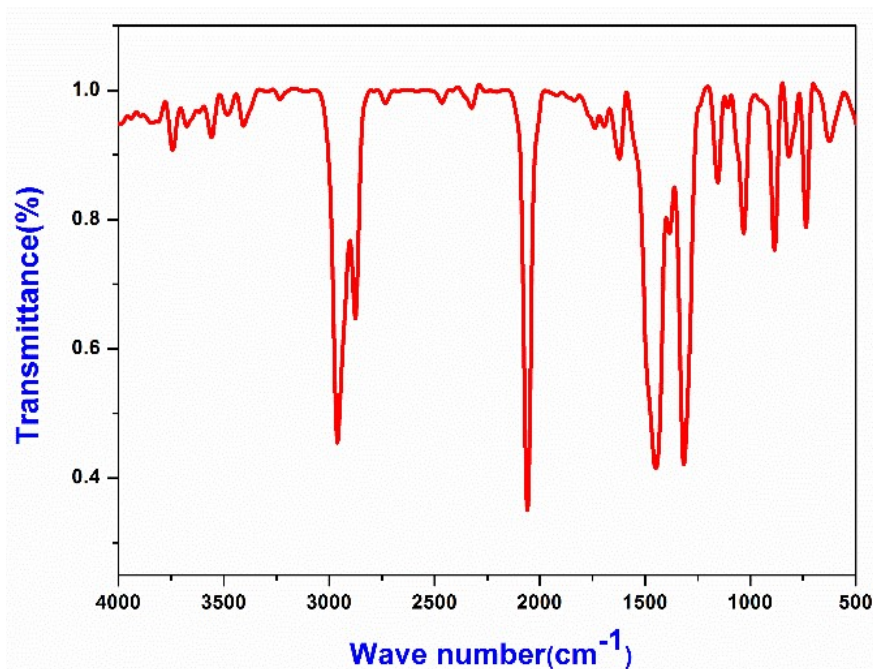

Fig. S1 Infrared spectrum of compound 1.

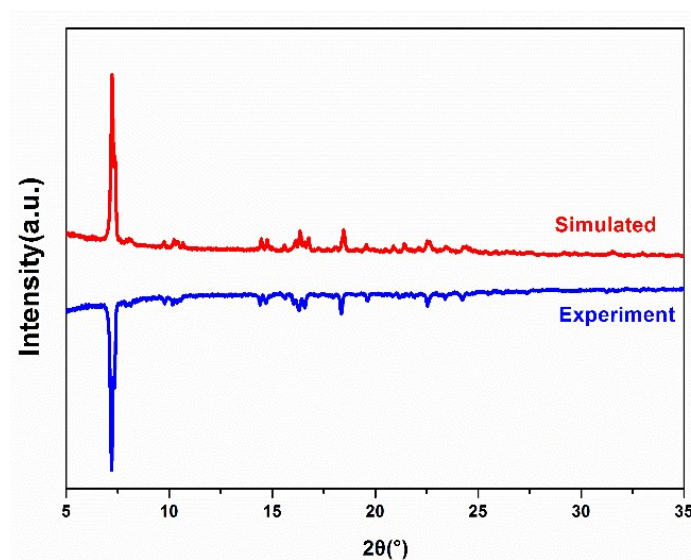

Fig. S2 The powder XRD of 1 with the simulated one in red and the measurement in blue.

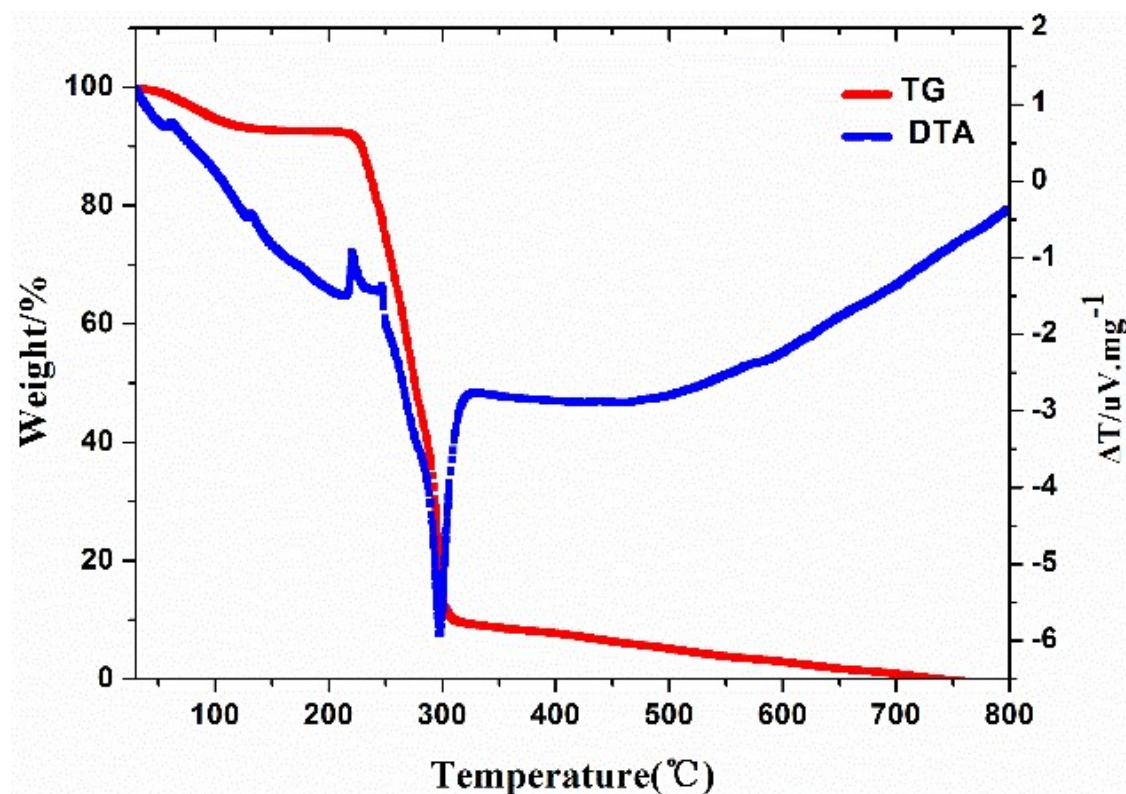

Fig. S3 TG-DTA curves for 1

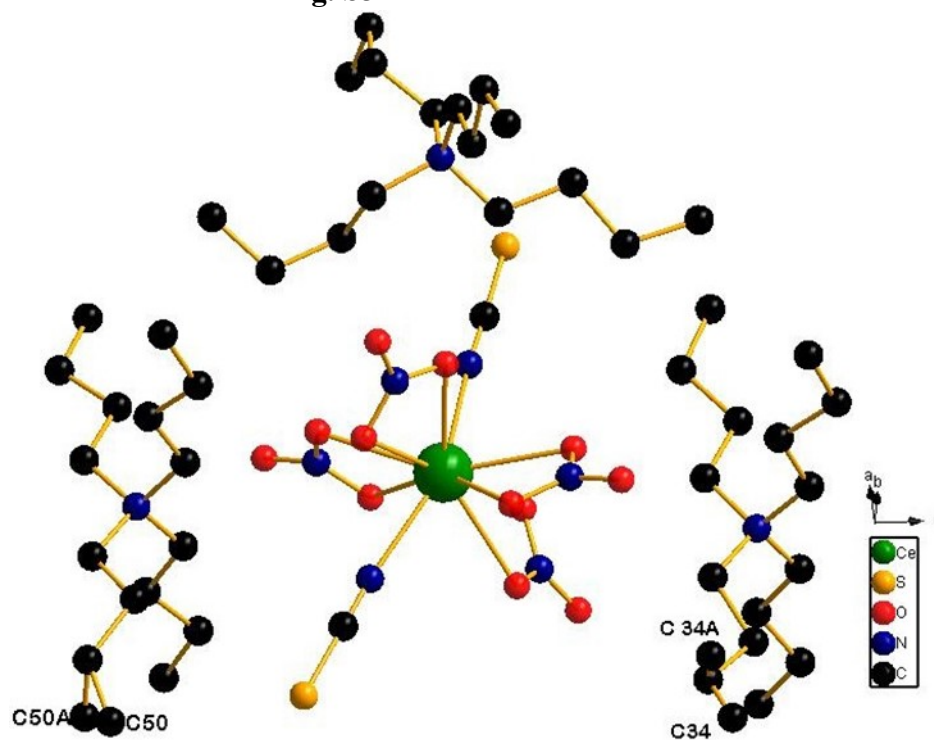

Fig. S4. The asymmetric structure of 1-LTP

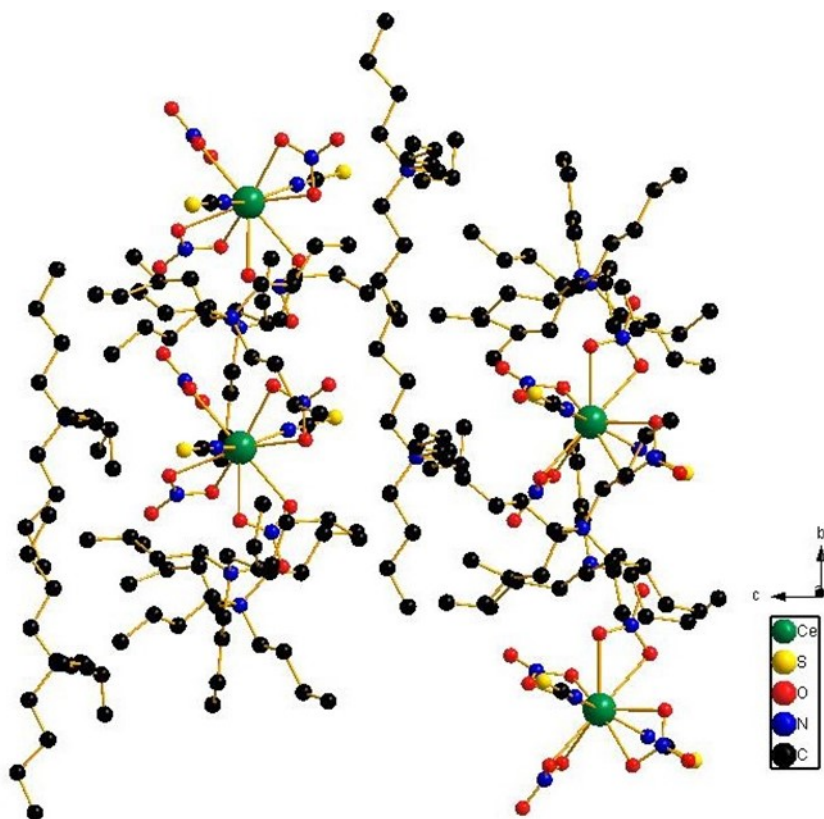

Fig. S5. The unit cell structure of **1-LTP**

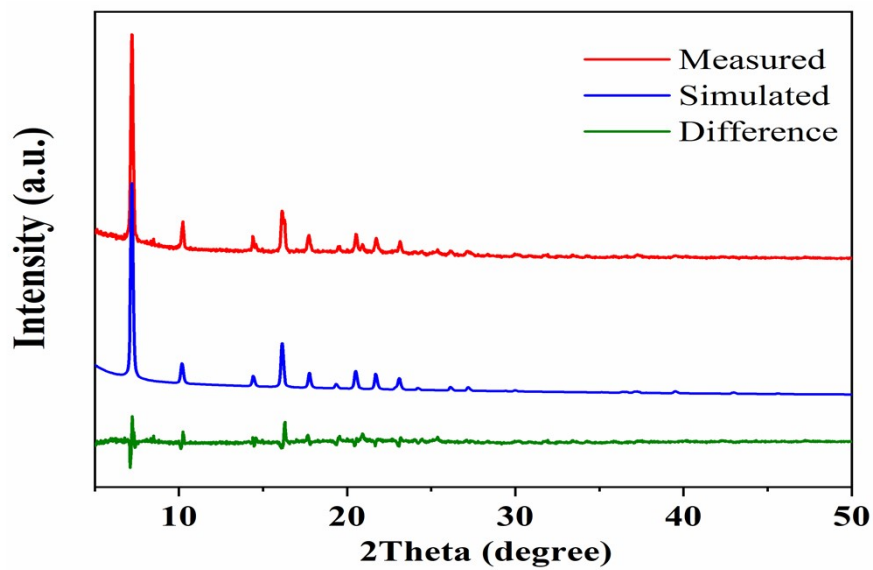

Fig. S6. The structural refinement results of PXRD data for **1** in 350 K.

Table S1 Crystal data and structure refinement for **1**

| Compound          | <b>1</b>                      |
|-------------------|-------------------------------|
| Empirical formula | $C_{50}H_{108}CeN_9O_{12}S_2$ |
| Formula weight    | 1231.69                       |
| Temperature/K     | 293                           |
| Crystal system    | monoclinic                    |
| Space group       | Cc                            |
| $a/\text{\AA}$    | 16.1541(2)                    |

|                                      |                                                   |
|--------------------------------------|---------------------------------------------------|
| b/Å                                  | 18.0486(2)                                        |
| c/Å                                  | 23.7037(3)                                        |
| α/°                                  | 90                                                |
| β/°                                  | 91.1550(10)                                       |
| γ/°                                  | 90                                                |
| Volume/Å <sup>3</sup>                | 6909.62(14)                                       |
| Z                                    | 4                                                 |
| ρ <sub>calc</sub> /g/cm <sup>3</sup> | 1.184                                             |
| μ/mm <sup>-1</sup>                   | 0.774                                             |
| F(000)                               | 2628.0                                            |
| Final R indexes [I>=2σ (I)]          | R <sub>1</sub> = 0.0363, wR <sub>2</sub> = 0.0981 |
| Final R indexes [all data]           | R <sub>1</sub> = 0.0390, wR <sub>2</sub> = 0.0994 |

## Calculation of ΔS and N

### Compound 1:

#### In the heating cycle mode

$$\Delta S_H = R \ln N_1$$

$$\Delta S_H = \int_{T_2}^{T_1} \frac{Q}{T} dT$$

$$\approx \frac{\Delta H}{T_c}$$

$$= \frac{11.62 J^{-1} mol \times 1231.7 g^{-1} mol}{408 K}$$

$$= 35.32 J \cdot mol^{-1} \cdot K^{-1}$$

$$N_1 = \exp\left(\frac{\Delta S_H}{R}\right) = \exp\left(\frac{35.32 J \cdot mol^{-1} \cdot K^{-1}}{8.314 J \cdot mol^{-1} \cdot K^{-1}}\right)$$

$$= 54.00$$

#### In the cooling cycle mode

$$\Delta S_C = R \ln N_2$$

$$\Delta S_C = \int_{T_2}^{T_1} \frac{Q}{T} dT$$

$$\approx \frac{\Delta H}{T_c}$$
$$= \frac{7.9 J^{-1} mol \times 1231.7 g^{-1} mol}{376 K}$$

$$= 25.97 J \cdot mol^{-1} \cdot K^{-1}$$

$$N_2 = \exp\left(\frac{\Delta S_c}{R}\right) = \exp\left(\frac{25.97 J \cdot mol^{-1} \cdot K^{-1}}{8.314 J \cdot mol^{-1} \cdot K^{-1}}\right)$$

$$= 24.00$$
